# Supplementary material for: Cav1.2 Activity and Downstream Signaling Pathways in the Hippocampus of An Animal Model of Depression
Source: PubMed Central journal article supplement (PMC7762021; doi:10.3390/cells9122609), 2020-12-04
Supplement: cells-09-02609-s001.pdf [file cells-09-02609-s001.pdf]

## Supplementary Figure 1

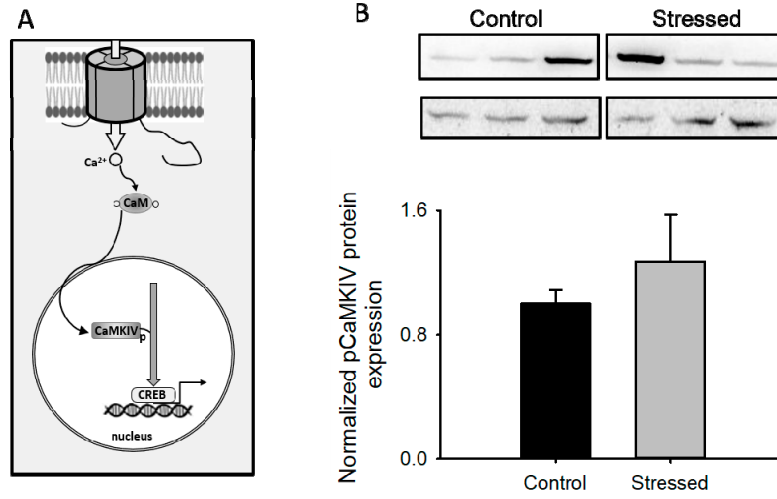

**Supplementary Figure 1. CaMKIV phosphorylation level in CRS-subjected animals:** (A) Schematic diagram depicting the signalling pathway studied in this figure. (B) Bar graph of pCaMKIV ( $n=4$ ) expression from whole hippocampus lysates normalized to the total respectively protein. Representative western blots for pCaMKIV, and total CaMKIV is shown in the upper part of the bar graph. Bar graphs are mean  $\pm$  SEM; black bars are control animals, and gray bars correspond to CRS-subjected animals. Given the reduced sample-size, a power of 80% was used in this statistical analysis.
